# Supplementary material for: Planning Individual and Population-Based Interventions in Global Health: Applying the DEA-A Framework to Promote Behavioral, Emotional, and/or Cognitive Change among Stakeholders
Source: Int J Environ Res Public Health. 2024 Mar 21;21(3):378. doi: 10.3390/ijerph21030378 (PMC10970467; doi:10.3390/ijerph21030378)
Supplement: Supplementary file 1 [file ijerph-21-00378-s001.zip › ijerph-2851680-supplementary/File S3_Step2 DEAA Matrix of Change Objectives.xlsx]

## Sheet: AO1
Actor or Organization [A/O] :
	Feedback			Determinants
AR change objectives (BR, CR or OR)		Functionality of AR	Dysfunctionality	at the Intrasystem-level			at the Ecosystem level
		(+)	of AR /
			Allostatic load
			(─)	S	C	R	E
				Stress/homeostatic imbalances	Cognitions about stake/resources	Resources at internal-level	Ecosystem context
	Actor
	Ecosyst.
	Actor
	Ecosyst.
	Actor
	Ecosyst.
	Actor
	Ecosyst.
*BR=Behavioral Regulation (leading to concrete modifications of the internal/external environment); CR=Cognitive Regulation (leading to reappraise the stake and/or resources); ER=Emotional Regulation (leading to endure/tolerate the arousal); S=Stress (determinants relating to the nature of the homeostatic imbalance(s) which motivate(s) in the sense of a drive both the need for regulation and the …

## Sheet: AO2
Actor or Organization [A/O] :
	Feedback			Determinants
AR change objectives (BR, CR or OR)		Functionality of AR	Dysfunctionality	at the Intrasystem-level			at the Ecosystem level
		(+)	of AR /
			Allostatic load
			(─)	S	C	R	E
				Stress/homeostatic imbalances	Cognitions about stake/resources	Resources at internal-level	Ecosystem context
	Actor
	Ecosyst.
	Actor
	Ecosyst.
	Actor
	Ecosyst.
	Actor
	Ecosyst.
*BR=Behavioral Regulation (leading to concrete modifications of the internal/external environment); CR=Cognitive Regulation (leading to reappraise the stake and/or resources); ER=Emotional Regulation (leading to endure/tolerate the arousal); S=Stress (determinants relating to the nature of the homeostatic imbalance(s) which motivate(s) in the sense of a drive both the need for regulation and the …

## Sheet: AO3
Actor or Organization [A/O] :
	Feedback			Determinants
AR change objectives (BR, CR or OR)		Functionality of AR	Dysfunctionality	at the Intrasystem-level			at the Ecosystem level
		(+)	of AR /
			Allostatic load
			(─)	S	C	R	E
				Stress/homeostatic imbalances	Cognitions about stake/resources	Resources at internal-level	Ecosystem context
	Actor
	Ecosyst.
	Actor
	Ecosyst.
	Actor
	Ecosyst.
	Actor
	Ecosyst.
*BR=Behavioral Regulation (leading to concrete modifications of the internal/external environment); CR=Cognitive Regulation (leading to reappraise the stake and/or resources); ER=Emotional Regulation (leading to endure/tolerate the arousal); S=Stress (determinants relating to the nature of the homeostatic imbalance(s) which motivate(s) in the sense of a drive both the need for regulation and the …
